# Supplementary material for: Small extracellular vesicles originating from TNFAIP6-ADSCs subpopoulation identified by single-cell RNA sequencing promote tendon healing
Source: Research Square preprint supplement (doi:10.21203/rs.3.rs-7279057/v1), 2025-08-19
Supplement: Supplementary file 1 [file bb4d75d9c8e93dafb96e7e74.docx]

**Table S2.** Primers for qRT-PCR used in the experiment

| Primer Name | Primers |
| --- | --- |
| miR- let-7c-5p | F: 5’ GCGCGTGAGGTAGTAGGTTGT 3’  R: 5’ AGTGCAGGGTCCGAGGTATT 3’ |
| U6 | F: 5’ CTCGCTTCGGCAGCACATATACT 3’  R: 5’ ACGCTTCACGAATTTGCGTGTC 3’ |
| CRCT1 | F: 5’ CGTCCTCCTCATCTTGTTGTGA 3’  R: 5’ GCAGGAGCGTTGAGACCTTT 3’ |
| GAPDH | F: 5’ ACTCCCATTCTTCCACCTTTG 3’  R: 5’ CCCTGTTGCTGTAGCCATATT 3’ |
