# Supplementary material for: Small extracellular vesicles originating from TNFAIP6-ADSCs subpopoulation identified by single-cell RNA sequencing promote tendon healing
Source: Research Square preprint supplement (doi:10.21203/rs.3.rs-7279057/v1), 2025-08-19
Supplement: Supplementary file 2 [file f2485560c2eafd61c4850e75.docx]

| Primer Name | Sense sequence |
| --- | --- |
| CRCT1 siRNA | 5’ GUCCUCCUCAUCUUGUUGUTT 3’ |
| NC siRNA | 5’ UUCUCCGAACGUGUCACGUTT 3’ |
| let-7c-5p mimics | 5’ CCAUACAACCUACUACCUCAUU 3’ |
| NC mimics | 5’ ACGUGACACGUUCGGAGAATT 3’ |
| let-7c-5p inhibitors | 5’ AACCAUACAACCUACUACCUCA 3’ |
| NC inhibitors | 5’ CAGUACUUUUGUGUAGUACAA 3’ |

**Table S1.** The sequence of miRNA and siRNA
